# Supplementary material
Source: publisher figshare collection journal article supplement (https://acs.figshare.com/ndownloader/files/4673998)
Supplement: Supplementary file 1 [file 4673998]

# Absence of Curie Relaxation in Paramagnetic Solids Yields Long $^1\text{H}$ Coherence Lifetimes

Gwendal Kervern,<sup>(a)</sup> Stefan Steuernagel,<sup>(b)</sup> Frank Engelke,<sup>(b)</sup> Guido Pintacuda<sup>(a)</sup>  
and Lyndon Emsley<sup>(a)</sup>

(a) Laboratoire de Chimie, UMR 5182 CNRS–ÉNS Lyon, École Normale Supérieure de Lyon,  
69364 Lyon, France;

(b) Bruker BioSpin GmbH, D 76287 Rheinstetten, Germany.

## Supporting Information

### 1. Predicted paramagnetic relaxation enhancements

The expression for the paramagnetic enhancement of longitudinal and transverse relaxation of a nuclear spin in the presence of a paramagnetic center with a fast-relaxing electronic spin, according to the Solomon-Bloembergen mechanism ( $R_1^{\text{SB}}$  and  $R_2^{\text{SB}}$ ) [1,2] and to the Curie mechanism ( $R_1^{\text{C}}$  and  $R_2^{\text{C}}$ ) are the following [1,3]:

$$R_2^{\text{SB}} = \frac{1}{15} \left( \frac{\mu_0}{4\pi} \right)^2 \frac{\hbar^2 \gamma_I^2 g_J^2 \mu_B^2 J(J+1)}{r_{Ln-I}^6} \left( 4\tau_c + \frac{\tau_c}{1+(\omega_I - \omega_S)^2 \tau_c^2} + \frac{3\tau_c}{1+\omega_I^2 \tau_c^2} + \frac{6\tau_c}{1+\omega_S^2 \tau_c^2} + \frac{6\tau_c}{1+(\omega_I + \omega_S)^2 \tau_c^2} \right) \\ + \frac{1}{3} J(J+1) \left( \frac{A}{\hbar} \right)^2 \left( \tau_e + \frac{\tau_e}{1+\omega_S^2 \tau_e^2} \right)$$

$$R_2^{\text{Curie}} = \frac{1}{5} \left( \frac{\mu_0}{4\pi} \right)^2 \frac{\gamma_I^2 B_0^2 \mu_B^4 g_e^4 J^2 (J+1)^2}{r_{Ln-I}^6 (3kT)^2} \left( 4\tau_r + \frac{3\tau_r}{1+(\omega_I \tau_r)^2} \right)$$

$$R_1^{\text{SB}} = \frac{2}{15} \left( \frac{\mu_0}{4\pi} \right)^2 \frac{\hbar^2 \gamma_I^2 g_J^2 \mu_B^2 J(J+1)}{r_{Ln-I}^6} \left( \frac{\tau_c}{1+(\omega_I - \omega_S)^2 \tau_c^2} + \frac{3\tau_c}{1+\omega_I^2 \tau_c^2} + \frac{6\tau_c}{1+(\omega_I + \omega_S)^2 \tau_c^2} \right) \\ + \frac{2}{3} J(J+1) \left( \frac{A}{\hbar} \right)^2 \left( \frac{\tau_e}{1+\omega_S^2 \tau_e^2} \right)$$

$$R_1^{\text{Curie}} = \frac{2}{5} \left( \frac{\mu_0}{4\pi} \right)^2 \frac{\gamma_I^2 B_0^2 \mu_B^4 g_e^4 J^2 (J+1)^2}{r_{Ln-I}^6 (3kT)^2} \left( \frac{3\tau_r}{1+(\omega_I \tau_r)^2} \right)$$

where  $\gamma_I$  is the magnetogyric ratio of the nuclear spin  $I$ ;  $\omega_I$  and  $\omega_S$  are the nuclear and electronic Larmor frequencies.  $\tau_r$  and  $\tau_e$  are the rotational and electronic correlation times,

respectively, and  $\frac{1}{\tau_c} = \frac{1}{\tau_e} + \frac{1}{\tau_r}$ .  $\hbar$  is Planck's constant divided by  $2\pi$ ,  $A$  the Fermi hyperfine coupling constant,  $\mu_0$  the vacuum permeability,  $\mu_B$  Bohr's magneton,  $B_0$  the magnetic field strength,  $k$  the Boltzmann factor,  $T$  the temperature,  $g_J$  and  $J$  are the  $g$ -factor and spin of the lanthanide ion. Finally,  $r_{Ln-I}$  denotes the distance between the lanthanide ion and the nuclear spin  $I$ . Typical values of the relaxation enhancements are illustrated in Table S1.

|            |                        |
|------------|------------------------|
| $R_1^{SB}$ | 30-140 s <sup>-1</sup> |
| $R_1^C$    | 165 s <sup>-1</sup>    |
| $R_2^{SB}$ | 30-150 s <sup>-1</sup> |
| $R_2^C$    | 200 s <sup>-1</sup>    |

Table S1. Paramagnetic relaxation enhancements experienced by a proton 5 Å from the metal center in a small molecule ( $\tau_R=100$  ps) containing Tb<sup>3+</sup> ( $J=6$ ;  $g_J=3/2$ ;  $\tau_e=2\cdot 10\cdot 10^{-13}$  s) [1].

## 2. NMR measurements

All NMR experiments were recorded at a temperature of 30±0.5°C on a Bruker Avance-500 spectrometer operating at a proton frequency of 500 MHz, and equipped with a triple-resonance TXI probe (liquid-state spectra) or with double-resonance 1.3 mm or 2.5 mm CP-MAS probes (solid-state spectra).

A sample for liquid-state NMR spectroscopy was prepared by dissolving about 20 mg of compound (**1**) in 0.5 ml D<sub>2</sub>O.

Samples for solid-state NMR spectroscopy were prepared by packing approximately 1 mg of powder into a 1.3 mm zirconia rotor (or approximately 5 mg of powder into a 2.5 mm

rotor). All solid-state NMR spectra were acquired with either a double-resonance 1.3 mm or 2.5 mm CP-MAS probe at 303 K.

As fast MAS efficiently removes a large part of  $^1\text{H}$ - $^1\text{H}$  dipolar couplings, no heteronuclear nor homonuclear decoupling was applied during acquisition. In the  $^1\text{H}$  spectra, the signals were recorded with 1  $\mu\text{s}$  sampling for a total acquisition time of 1 ms. To avoid baseline distortions on the very large spectral width, a rotor-synchronous double spin-echo refocusing sequence employing tanh/tan SHAPs ( $\tau_p=50\mu\text{s}$ ;  $B_{1\text{max}}=200$  kHz;  $\Delta\omega_{\text{max}}/(2\pi)=5\text{MHz}$ ) was always used before acquisition [4]. The RF nutation frequency used for all pulses was 200 kHz.

Non-selective  $T_1$  relaxation times of the  $^1\text{H}$  resonances were measured by an inversion-recovery sequence. In the solid, inversion was performed by a 33  $\mu\text{s}$  tanh/tan SHAP pulse with a  $B_{1\text{max}}$  of 200 kHz and  $\Delta\omega_{\text{max}}/(2\pi)=5\text{MHz}$  [4]. Ten experiments with relaxation delays in the range between 0.5 ms and 50 ms were recorded using an interscan recovery delay of 5 s. The measured echo peak intensities were fitted to a two-parameter exponential equation.

Paramagnetic enhancements of the  $R_2$  relaxation rates of the  $^1\text{H}$  resonances were measured in two ways, (i) in liquids, by evaluating the full line widths at half-height ( $\Delta\nu^p$ ) in the  $^1\text{H}$  spectrum, and disregarding the presence of scalar couplings ( $R_2^p = \pi \Delta\nu^p$ ); (ii) in solids, by evaluating the exponential decay of the echo tops in a CPMG experiment [5], where the FID sampling (up to 10 ms) is interrupted by  $n$  basic elements of rotor-synchronized tanh/tan SHAP pulse pairs ( $\tau_p=50\mu\text{s}$ ;  $B_{1\text{max}}=200$  kHz;  $\Delta\omega_{\text{max}}/(2\pi)=5\text{MHz}$ ).

### 3. Experimental determination of relaxation rates in solution and in the solid

The liquid-state spectrum of (**1**) (figure 1 SI) shows two lines, at 39 ppm (ortho protons [6]) and at 35 ppm (para proton). The two signals have longitudinal relaxation times of 3.5 and 8.1

ms, respectively, and transverse relaxation times of 1.4 and 1.96 ms, equivalent to a linewidth of  $228 \pm 0.5$  Hz and  $162 \pm 0.5$  Hz, respectively.

In the solid-state, the ortho and para proton sites are predicted to have largely different dipolar shift anisotropy. In particular, the dipolar anisotropy predicted following Nayeem and Yesinowski (*J. Chem. Phys.* **1988**, 89, 4600-4608) on the basis of the crystal structure (Cambridge database code: JEXWOY) is in the range 1000-2300 ppm for the para proton, which thus becomes unobservable under MAS, and is not refocused using the SHAP pulses here, tailored for a bandwidth of 1000 ppm. The MAS  $^1\text{H}$  spectrum is thus representative of only the ortho protons, whose anisotropy is predicted in the range 500-1000 ppm. The longitudinal ( $T_1$ ) and transverse ( $T_2'$ ) relaxation times of the ortho protons are measured to be  $T_1 = 7.5$  ms and  $T_2' = 1.7$  ms (figure 2 SI), respectively, the latter being equivalent to a refocussable linewidth of 187 Hz ( $R_{\text{fit}}=0.93314$ ).

#### 4. Bibliography

- [1] Bertini, I.; Luchinat, C. and Parigi, G., *Solution NMR of paramagnetic molecules: applications to metalloproteins and models*. Elsevier: Amsterdam; London, 2001.
- [2] Solomon, I. S., *Phys. Rev. A* **1955**, 99, 559-565; Bloembergen, N. *J. Chem. Phys.* **1957**, 27, 575-576.
- [3] Gueron, M., *J. Magn. Reson.* **1975**, 19, 58-66; Vega, A. J. and Fiat, D., *Mol. Phys.* **1976**, 31, 347-355.
- [4] Kervern, G.; Pintacuda, G. and Emsley, L., *Chem. Phys. Lett.* **2007**, 435, 157-162.
- [5] Carr, H. Y. and Purcell, E. M., *Phys. Rev.* **1954**, 94, 630; Meiboom, S. and Gill, D., *Rev. Sci. Instrum.* **1958**, 29, 688.
- [6] Ouali, N.; Bocquet, B.; Rigault, S.; Morgantini, P. Y.; Weber, J. and Piguet, C., *Inorg. Chem.* **2002**, 41, 1436-45.

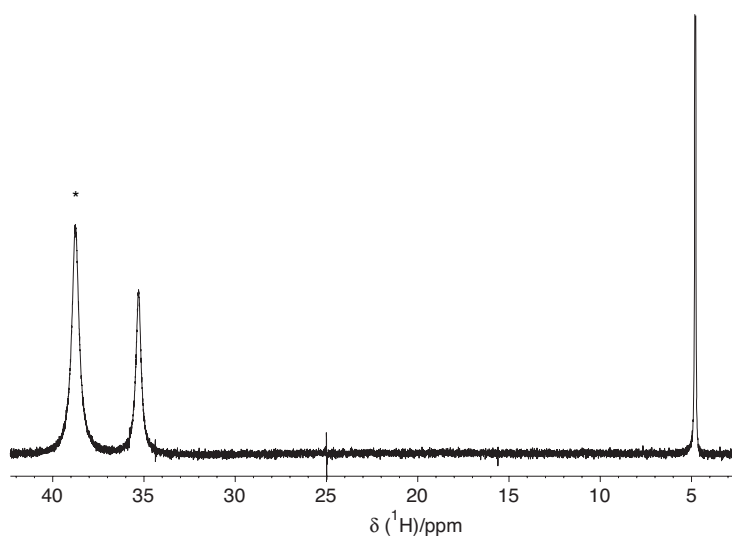

**Figure 1 SI**

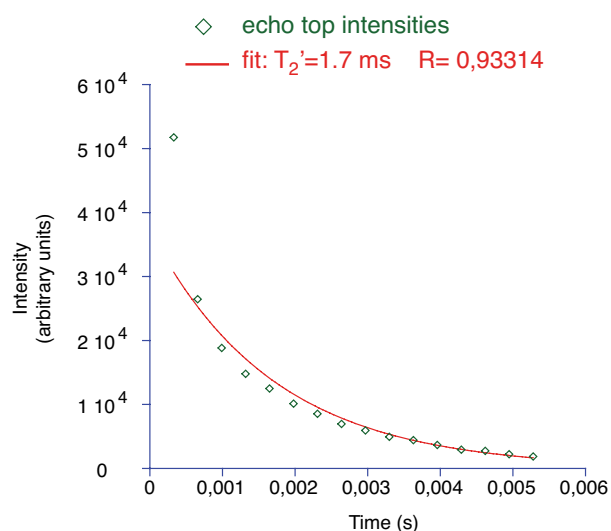

**Figure 2 SI**

Figure 1 SI:

Liquid state  $^1\text{H}$  spectrum of compound (**1**) obtained on a 500 MHz spectrometer (Bruker Avance) at  $T=30^\circ\text{C} \pm 0.5^\circ\text{C}$ . The resonances at 35 and 39 ppm (\*) correspond respectively to the para and ortho protons. The Bruker topspin utility gives a full linewidth at half height of  $228 \pm 0.5$  Hz for the ortho resonance.

Figure 2 SI: Intensity of the echo tops of the adiabatic CPMG experiment obtained on compound (**1**) for protons at 500 MHz,  $T=30 \pm 0.5^\circ\text{C}$ . The decay is fitted by a mono exponential curve that gives a  $T_2'$  of 1.7 ms, which corresponds to a non-refocusable linewidth of 187 Hz.
